# Supplementary material
Source: publisher site journal article supplement (https://www.dovepress.com/article/396088)
Supplement: Supplementary file 1 [file get_supplementary_file.php]

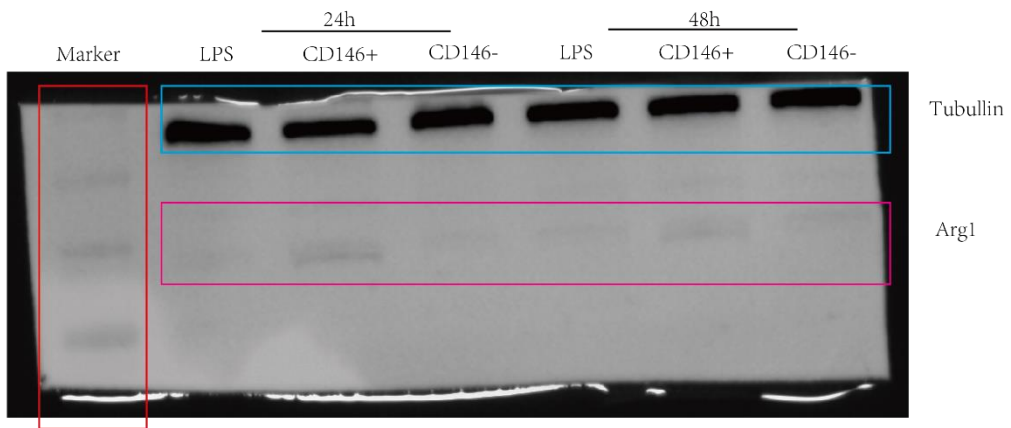

FigS1. The original full-length blot images  
The expression of Tubullin is very high. Under the same exposure conditions, the Arg1 band is not obvious.

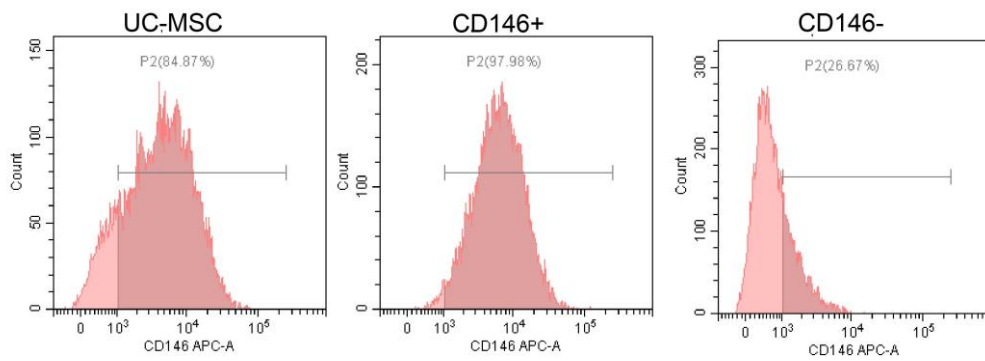

Figure S2. Flow Cytometry detection for CD146 expression in UC-MSCs before and after separation using magnetic beads.
